# Supplementary material
Source: Research Square preprint supplement (doi:10.21203/rs.3.rs-9236704/v1)
Supplement: Supplementary file 1 [file ddef52ca15919ca4298e18cf.xlsx]

## Sheet: Table1
Cohort	Sample source	Total samples (n)	Primary grouping	Group details	Usable grouped samples (n)	Time structure	Role in study	Main contribution	Notes
GSE65682	Whole blood	802	28-day ICU outcome	ICU_Survivor_28d | ICU_NonSurvivor_28d	479	Single timepoint / not modeled as longitudinal	Discovery cohort for outcome stratification	Framework discovery and outcome association	Contains healthy/control-like or non-outcome-assigned samples as NA in outcome_group
GSE57065	Whole blood	107	Healthy vs septic shock/patient	Septic_Shock_or_Patient | Healthy_Control	107	0 h: 28; 24 h: 28; 48 h: 26	External validation cohort (disease-state validation)	Biological relevance and external disease-state support	Includes repeated septic timepoints across 0 h / 24 h / 48 h
GSE48080	PBMC	23	Healthy / septic survivor / septic non-survivor	Septic_Survivor | Septic_NonSurvivor | Healthy_Control	23	Healthy=3; Survivor=10; Non-survivor=10	PBMC supplementary cohort	Orthogonal supplementary support	Used as supplementary PBMC-level support rather than primary validation

## Sheet: Sheet1
Module	Gene symbol	Functional category	Biological interpretation	Highlighted in focused volcano	Notes
MS2_APC	AIF1	Myeloid activation marker	APC-like / antigen-presentation-associated myeloid program	No	Core APC-associated feature gene
MS2_APC	APOE	Lipid handling / phagocyte-associated	APC-like / antigen-presentation-associated myeloid program	No	Core APC-associated feature gene
MS2_APC	C1QA	Complement / phagocyte-associated	APC-like / antigen-presentation-associated myeloid program	No	Core APC-associated feature gene
MS2_APC	C1QB	Complement / phagocyte-associated	APC-like / antigen-presentation-associated myeloid program	No	Core APC-associated feature gene
MS2_APC	C1QC	Complement / phagocyte-associated	APC-like / antigen-presentation-associated myeloid program	No	Core APC-associated feature gene
MS2_APC	CD74	MHC-II invariant chain	APC-like / antigen-presentation-associated myeloid program	Yes	Core APC-associated feature gene
MS2_APC	CST3	Antigen processing / immune regulation	APC-like / antigen-presentation-associated myeloid program	No	Core APC-associated feature gene
MS2_APC	CTSS	Antigen processing lysosomal protease	APC-like / antigen-presentation-associated myeloid program	Yes	Core APC-associated feature gene
MS2_APC	FCER1G	Myeloid immunoreceptor adaptor	APC-like / antigen-presentation-associated myeloid program	Yes	Core APC-associated feature gene
MS2_APC	FCGR3A	Fc receptor / phagocyte function	APC-like / antigen-presentation-associated myeloid program	No	Core APC-associated feature gene
MS2_APC	HLA-DMA	MHC-II peptide loading	APC-like / antigen-presentation-associated myeloid program	No	Core APC-associated feature gene
MS2_APC	HLA-DMB	MHC-II peptide loading	APC-like / antigen-presentation-associated myeloid program	Yes	Core APC-associated feature gene
MS2_APC	HLA-DPA1	MHC-II antigen presentation	APC-like / antigen-presentation-associated myeloid program	No	Core APC-associated feature gene
MS2_APC	HLA-DPB1	MHC-II antigen presentation	APC-like / antigen-presentation-associated myeloid program	Yes	Core APC-associated feature gene
MS2_APC	HLA-DRA	MHC-II antigen presentation	APC-like / antigen-presentation-associated myeloid program	Yes	Core APC-associated feature gene
MS2_APC	HLA-DRB1	MHC-II antigen presentation	APC-like / antigen-presentation-associated myeloid program	No	Core APC-associated feature gene
MS2_APC	IFI30	Antigen processing reductase	APC-like / antigen-presentation-associated myeloid program	No	Core APC-associated feature gene
MS2_APC	LILRB1	Inhibitory myeloid receptor	APC-like / antigen-presentation-associated myeloid program	No	Core APC-associated feature gene
MS2_APC	LST1	Myeloid lineage / immune regulation	APC-like / antigen-presentation-associated myeloid program	Yes	Core APC-associated feature gene
MS2_APC	MS4A7	Monocyte/macrophage-associated marker	APC-like / antigen-presentation-associated myeloid program	No	Core APC-associated feature gene
MS2_APC	SAT1	Polyamine metabolism / myeloid activation	APC-like / antigen-presentation-associated myeloid program	No	Core APC-associated feature gene
MS2_APC	TYMP	Myeloid activation / metabolic enzyme	APC-like / antigen-presentation-associated myeloid program	No	Core APC-associated feature gene
MS3_IFN_stress	BST2	IFN-inducible antiviral restriction factor	IFN/stress-responsive myeloid program	Yes	Core IFN/stress-associated feature gene
MS3_IFN_stress	CXCL10	IFN-inducible chemokine	IFN/stress-responsive myeloid program	No	Core IFN/stress-associated feature gene
MS3_IFN_stress	GBP1	IFN-inducible GTPase	IFN/stress-responsive myeloid program	No	Core IFN/stress-associated feature gene
MS3_IFN_stress	GBP2	IFN-inducible GTPase	IFN/stress-responsive myeloid program	No	Core IFN/stress-associated feature gene
MS3_IFN_stress	IFI27	Interferon response / stress adaptation	IFN/stress-responsive myeloid program	No	Core IFN/stress-associated feature gene
MS3_IFN_stress	IFI44	Interferon-stimulated gene	IFN/stress-responsive myeloid program	No	Core IFN/stress-associated feature gene
MS3_IFN_stress	IFI44L	Interferon-stimulated gene	IFN/stress-responsive myeloid program	No	Core IFN/stress-associated feature gene
MS3_IFN_stress	IFI6	Interferon response / stress adaptation	IFN/stress-responsive myeloid program	No	Core IFN/stress-associated feature gene
MS3_IFN_stress	IFIT1	Type I IFN response	IFN/stress-responsive myeloid program	Yes	Core IFN/stress-associated feature gene
MS3_IFN_stress	IFIT2	Type I IFN response	IFN/stress-responsive myeloid program	Yes	Core IFN/stress-associated feature gene
MS3_IFN_stress	IFIT3	Type I IFN response	IFN/stress-responsive myeloid program	No	Core IFN/stress-associated feature gene
MS3_IFN_stress	IRF7	Type I IFN transcriptional regulator	IFN/stress-responsive myeloid program	No	Core IFN/stress-associated feature gene
MS3_IFN_stress	ISG15	Interferon-stimulated gene	IFN/stress-responsive myeloid program	No	Core IFN/stress-associated feature gene
MS3_IFN_stress	MX1	Antiviral IFN effector	IFN/stress-responsive myeloid program	No	Core IFN/stress-associated feature gene
MS3_IFN_stress	MX2	Antiviral IFN effector	IFN/stress-responsive myeloid program	Yes	Core IFN/stress-associated feature gene
MS3_IFN_stress	OAS1	Antiviral IFN effector	IFN/stress-responsive myeloid program	No	Core IFN/stress-associated feature gene
MS3_IFN_stress	OAS2	Antiviral IFN effector	IFN/stress-responsive myeloid program	Yes	Core IFN/stress-associated feature gene
MS3_IFN_stress	OAS3	Antiviral IFN effector	IFN/stress-responsive myeloid program	No	Core IFN/stress-associated feature gene
MS3_IFN_stress	RSAD2	Antiviral IFN effector	IFN/stress-responsive myeloid program	No	Core IFN/stress-associated feature gene
MS3_IFN_stress	SIGLEC1	IFN-responsive myeloid marker	IFN/stress-responsive myeloid program	No	Core IFN/stress-associated feature gene
MS3_IFN_stress	STAT1	IFN signal transduction	IFN/stress-responsive myeloid program	No	Core IFN/stress-associated feature gene
MS3_IFN_stress	XAF1	Stress / IFN-associated apoptosis regulation	IFN/stress-responsive myeloid program	Yes	Core IFN/stress-associated feature gene

## Sheet: Sheet2
Cohort	Comparison	Metric	Group 1	Group 2	N (Group 1)	N (Group 2)	Group 1 statistic	Group 2 statistic	Mean difference	Median difference	Cohen's d	P value	Effect direction
GSE65682	NonSurvivor vs Survivor	MS1 inflammatory	ICU_Survivor_28d	ICU_NonSurvivor_28d	365	114	mean=0.033; median=0.047	mean=-0.135; median=-0.078	-0.168	-0.126	-0.38	0.003	ICU_NonSurvivor_28d < ICU_Survivor_28d
GSE65682	NonSurvivor vs Survivor	MS2 APC	ICU_Survivor_28d	ICU_NonSurvivor_28d	365	114	mean=-0.195; median=-0.156	mean=-0.501; median=-0.468	-0.307	-0.312	-0.41	<0.001	ICU_NonSurvivor_28d < ICU_Survivor_28d
GSE65682	NonSurvivor vs Survivor	MS3 IFN/stress	ICU_Survivor_28d	ICU_NonSurvivor_28d	365	114	mean=0.092; median=-0.070	mean=-0.011; median=-0.148	-0.103	-0.078	-0.16	0.113	ICU_NonSurvivor_28d < ICU_Survivor_28d
GSE65682	NonSurvivor vs Survivor	Dual-axis index	ICU_Survivor_28d	ICU_NonSurvivor_28d	365	114	mean=0.286; median=0.256	mean=0.490; median=0.382	0.204	0.125	0.24	0.027	ICU_NonSurvivor_28d > ICU_Survivor_28d
GSE57065	Septic vs Healthy	MS1 inflammatory	Healthy_Control	Septic_Shock_or_Patient	25	82	mean=-0.197; median=-0.096	mean=0.060; median=0.045	0.257	0.141	0.61	0.021	Septic_Shock_or_Patient > Healthy_Control
GSE57065	Septic vs Healthy	MS2 APC	Healthy_Control	Septic_Shock_or_Patient	25	82	mean=1.264; median=1.355	mean=-0.385; median=-0.431	-1.650	-1.786	-2.89	<0.001	Septic_Shock_or_Patient < Healthy_Control
GSE57065	Septic vs Healthy	MS3 IFN/stress	Healthy_Control	Septic_Shock_or_Patient	25	82	mean=-0.203; median=-0.239	mean=0.062; median=-0.016	0.265	0.223	0.46	0.004	Septic_Shock_or_Patient > Healthy_Control
GSE57065	Septic vs Healthy	Dual-axis index	Healthy_Control	Septic_Shock_or_Patient	25	82	mean=-1.468; median=-1.512	mean=0.447; median=0.425	1.915	1.937	3.29	<0.001	Septic_Shock_or_Patient > Healthy_Control
GSE48080	Sepsis vs Healthy	MS1 inflammatory	Healthy_Control	Sepsis	3	20	mean=-0.713; median=-0.712	mean=0.107; median=0.137	0.820	0.850	1.26	0.035	Sepsis > Healthy_Control
GSE48080	Sepsis vs Healthy	MS2 APC	Healthy_Control	Sepsis	3	20	mean=0.415; median=0.321	mean=-0.062; median=-0.291	-0.477	-0.612	-0.58	0.230	Sepsis < Healthy_Control
GSE48080	Sepsis vs Healthy	MS3 IFN/stress	Healthy_Control	Sepsis	3	20	mean=-0.257; median=-0.174	mean=0.039; median=-0.002	0.295	0.172	0.42	0.635	Sepsis > Healthy_Control
GSE48080	Sepsis vs Healthy	Dual-axis index	Healthy_Control	Sepsis	3	20	mean=-0.672; median=-0.760	mean=0.101; median=0.129	0.772	0.888	1.35	0.060	Sepsis > Healthy_Control
GSE48080	NonSurvivor vs Survivor	MS1 inflammatory	Septic_Survivor	Septic_NonSurvivor	10	10	mean=0.071; median=-0.139	mean=0.143; median=0.324	0.072	0.462	0.10	0.427	Septic_NonSurvivor > Septic_Survivor
GSE48080	NonSurvivor vs Survivor	MS2 APC	Septic_Survivor	Septic_NonSurvivor	10	10	mean=0.076; median=-0.165	mean=-0.201; median=-0.291	-0.277	-0.126	-0.32	0.734	Septic_NonSurvivor < Septic_Survivor
GSE48080	NonSurvivor vs Survivor	MS3 IFN/stress	Septic_Survivor	Septic_NonSurvivor	10	10	mean=0.216; median=0.106	mean=-0.139; median=-0.111	-0.356	-0.216	-0.49	0.385	Septic_NonSurvivor < Septic_Survivor
GSE48080	NonSurvivor vs Survivor	Dual-axis index	Septic_Survivor	Septic_NonSurvivor	10	10	mean=0.140; median=0.129	mean=0.061; median=0.076	-0.079	-0.053	-0.14	0.623	Septic_NonSurvivor < Septic_Survivor
